# Supplementary material for: Early interventions for post-traumatic stress following musculoskeletal trauma: protocol for a systematic review and meta-analysis
Source: HighWire-hosted journal article supplement (doi:10.1136/bmjopen-2022-065590), 2022-09-01
Supplement: bmjopen-2022-065590supp002_data_supplement.pdf [file bmjopen-2022-065590supp002_data_supplement.pdf]

## Early interventions for post-traumatic stress following musculoskeletal trauma: Protocol for a systematic review and meta-analysis

### Medline search strategy

#### 1. Post-traumatic stress symptom

Post-traumatic stress.mp OR Post-traumatic stress disorder.mp OR Post traumatic.mp OR Post-traumatic stress symptom.mp OR Stress symptoms.mp OR Post-trauma\*.mp OR PTSS.mp or PTSD.mp OR Acute stress disorder.mp OR ASD.mp

#### 2. Musculoskeletal trauma

Musculoskeletal trauma.mp OR musculoskeletal injury.mp OR Orthopaedic trauma.mp OR Orthopaedic injuries.mp OR Orthopedic trauma.mp OR Orthopedic injury.mp OR Musculoskeletal.mp OR Musculoskeletal inj\* OR Lower extremity inj\* OR Upper extremity inj\* OR Exp fractures, bone OR Exp whiplash injuries OR Whiplash.mp OR Athletic injuries.mp OR Traumatic injuries.mp OR Falls.mp OR Traffic collision.mp OR Exp multiple trauma OR Traumatic inj\* OR Gunshot injury\* OR Stab wound\*

#### 3. Intervention

Psychotherapies.mp OR psychotherap\* OR physiotherap\* OR physical therap\* OR emdr.mp OR eye movement desensiti\* OR prevention.mp OR intervention.mp OR therap\* OR psychoeducation.mp OR treatment.mp OR cognitive behavioural therapy.mp OR CBT.mp OR rehabilitation.mp OR imagery.mp OR exercis\*.mp OR movement therapy.mp OR exercise training.mp OR physical activit\*.mp OR aerobic exercise.mp OR physical exercise.mp OR resistance training.mp OR strength training.mp OR endurance exercise.mp OR physical therap\*.mp OR manual therap\*.mp OR massage.mp OR acupuncture OR aerobic.mp

## CINAHL search strategy

### 1. Post-traumatic stress symptom

Post traumatic **OR** Post-traumatic stress symptom **OR** Post-trauma **OR** PTSS **OR** Post-traumatic stress **OR** Post-traumatic stress disorder **OR** Post-traumatic stress symptom **OR** PTSD **OR** Acute stress disorder **OR** ASD

### 2. Musculoskeletal trauma

Musculoskeletal trauma **OR** Musculoskeletal injury **OR** Orthopaedic trauma **OR** Orthopaedic injury **OR** Orthopedic trauma **OR** Lower extremity injury **OR** Upper extremity injury **OR** Fractures, bone **OR** Whiplash injuries **OR** Whiplash **OR** Athletic injury **OR** Multiple trauma **OR** Traumatic injury **OR** Traumatic injuries **OR** Falls **OR** Gunshot injury **OR** Stab wound **OR** Traffic collision

### 3. Intervention

Psychotherapies **OR** psychotherapy **OR** physiotherapy **OR** physical therapy **OR** EMDR **OR** eye movement desensitisation **OR** prevention **OR** intervention **OR** therapy **OR** psychoeducation **OR** treatment **OR** cognitive behavioural therapy **OR** CBT **OR** rehabilitation **OR** imagery **OR** exercise **OR** movement therapy **OR** exercise training **OR** physical activity **OR** aerobic exercise **OR** physical exercise **OR** resistance training **OR** strength training **OR** endurance exercise **OR** physical therapy **OR** manual therapy **OR** massage **OR** acupuncture **OR** aerobic

## EMBASE search strategy

### 1. Post-traumatic stress symptom

Post traumatic.ab, ti **OR** Post-traumatic stress symptom\$.ab, ti **OR** Post-trauma.mp **OR** PTSS.mp **OR** Post traumatic stress.mp **OR** Post-traumatic stress disorder.mp **OR** Post traumatic.mp **OR** Post-traumatic stress symptom.mp **OR** PTSD.mp **OR** Acute stress disorder.mp **OR** ASD.mp  
PTSS.tw

### 2. Musculoskeletal trauma

Musculoskeletal trauma.mp **OR** musculoskeletal injury.mp **OR** Orthopaedic trauma.mp **OR** orthopedic trauma.mp **OR** Fractures, bone.mp **OR** Whiplash injuries.mp **OR** Whiplash.mp **OR** Multiple trauma.mp **OR** Traumatic injuries.mp **OR** Falls.mp **OR** Gunshot injury.mp **OR** Stab wound.mp **OR** Traffic collision.mp **OR** Musculoskeletal inj\$.ab,ti **OR** Orthopaedic inj\$.ab,ti **OR** Orthopedic inj\$.ab,ti **OR** Lower extremity inj\$.ab,ti **OR** Upper extremity inj\$.ab,ti **OR** Athletic inj\$.ab,ti **OR** Traumatic inj\$.ab,ti

### 3. Intervention

Psychotherap\$.ab,ti **OR** Psychotherapies.mp **OR** Psychotherapy.mp **OR** physiotherapy\$.ab,ti **OR** Physiotherapies.mp **OR** Physiotherapy.mp **OR** physical therap\$.ti,ab **OR** physical therapies.mp **OR** physical therapy.mp **OR** EMDR.mp **OR** eye movement desensitisation.mp **OR** desensitization.mp **OR** prevention.mp **OR** intervention.mp **OR** therap\$.ab,ti **OR** therapies.mp **OR** therapy.mp **OR** psychoeducation.mp **OR** treatment.mp **OR** cognitive behavioural therapy.mp **OR** CBT.mp **OR** rehabilitation.mp **OR** imagery.mp **OR** exercise.mp **OR** movement therapy.mp **OR** exercise training.mp **OR** physical activity.mp **OR** aerobic exercise.mp **OR** physical exercise.mp **OR** resistance training.mp **OR** strength training.mp **OR** endurance exercise.mp

**OR** physical therapy.mp **OR** manual therapy.mp **OR** massage.mp **OR** acupuncture **OR** aerobic.mp

### PsycINFO search strategy

#### 1. Post-traumatic stress symptom

Post-traumatic stress disorder.mp **OR** post-traumatic stress disorders.mp **OR** posttraumatic stress disorder.mp **OR** posttraumatic stress disorders.mp **OR** disorder\* **OR** post-traumatic.mp **OR** post-traumatic stress symptom\*.mp **OR** post traumatic stress symptom\*.mp **OR** PTSS.mp **OR** PTSD.mp **OR** acute stress disorder.mp **OR** ASD.mp

#### 2. Musculoskeletal trauma

Musculoskeletal trauma.mp **OR** musculoskeletal injur\*.mp **OR** orthopaedic trauma.mp **OR** orthopaedic injur\*.mp **OR** orthopedic trauma.mp **OR** lower extremity injur\*.mp **OR** upper extremity injur\*.mp **OR** fracture\*.mp **OR** bone.mp **OR** whiplash injur\*.mp **OR** whiplash **OR** athletic injur\*.mp **OR** multiple trauma.mp **OR** traumatic injur\*.mp **OR** traumatic injur\*.mp **OR** falls.mp **OR** gunshot injur\*.mp **OR** stab wound\*.mp **OR** traffic collision\*.mp

#### 3. Intervention

Psychotherap\* **OR** Psychotherapies.mp **OR** Psychotherapy.mp **OR** physiotherapy\* **OR** Physiotherapies.mp **OR** Physiotherapy.mp **OR** physical therap\* **OR** physical therapies.mp **OR** physical therapy.mp **OR** EMDR.mp **OR** eye movement desensitisation.mp **OR** desensitization.mp **OR** prevention.mp **OR** intervention.mp **OR** therap\* **OR** therapies.mp **OR** therapy.mp **OR** psychoeducation.mp **OR** treatment.mp **OR** cognitive behavioural therapy.mp **OR** CBT.mp **OR** rehabilitation.mp **OR** imagery.mp **OR** exercis\* **OR** movement therapy.mp **OR** exercise training.mp **OR** physical activit\* **OR** aerobic exercise.mp **OR** physical exercise.mp **OR** resistance training.mp **OR** strength training.mp **OR** endurance exercise.mp **OR** physical therap\* **OR** manual therap\* **OR** massage.mp **OR** acupuncture **OR** aerobic.mp

## PubMed search strategy

### 1. Post-traumatic stress symptom

Post-traumatic stress **OR** Post-traumatic stress disorder **OR** Post traumatic **OR** Post-traumatic stress symptom **OR** Stress symptoms **OR** Post-trauma **OR** PTSS **OR** PTSD **OR** Acute stress disorder **OR** ASD

### 2. Musculoskeletal trauma

Musculoskeletal trauma **OR** musculoskeletal injury **OR** Orthopaedic trauma **OR** Orthopaedic injuries **OR** Orthopedic trauma **OR** Orthopedic injury **OR** Musculoskeletal **OR** Orthopaedic **OR** Musculoskeletal injury **OR** Lower extremity injury **OR** Upper extremity injury **OR** fractures **OR** bone **OR** whiplash injuries **OR** Whiplash **OR** Athletic injuries **OR** Traumatic injuries **OR** Falls **OR** Traffic collision **OR** multiple trauma **OR** Traumatic injury **OR** Gunshot injury **OR** Stab wound

### 3. Intervention

Psychotherapy **OR** Psychotherapies **OR** Physiotherapy **OR** Physiotherapies **OR** physical therapy **OR** physical therapies **OR** EMDR **OR** eye movement desensitisation **OR** desensitization **OR** prevention **OR** intervention **OR** therapy **OR** therapies **OR** psychoeducation **OR** treatment **OR** cognitive behavioural therapy **OR** CBT **OR** rehabilitation **OR** imagery **OR** exercise **OR** movement therapy **OR** exercise training **OR** physical activity **OR** aerobic exercise **OR** physical exercise **OR** resistance training **OR** strength training **OR** endurance exercise **OR** physical therapy **OR** manual therapy **OR** massage **OR** acupuncture **OR** aerobic

## Web of Science search strategy

### 1. Part 1: Post-traumatic stress symptom

Post-traumatic stress **OR** Post-traumatic stress disorder **OR** Post traumatic **OR** Post-traumatic stress symptom **OR** Stress symptoms **OR** Post-trauma **OR** PTSS **OR** PTSD **OR** Acute stress disorder **OR** ASD

### 2. Musculoskeletal trauma

Musculoskeletal trauma **OR** musculoskeletal injury **OR** Orthopaedic trauma **OR** Orthopaedic injuries **OR** Orthopedic trauma **OR** Orthopedic injury **OR** Musculoskeletal **OR** Orthopaedic **OR** Musculoskeletal injury **OR** Lower extremity injury **OR** Upper extremity injury **OR** fractures **OR** bone **OR** whiplash injuries **OR** Whiplash **OR** Athletic injuries **OR** Traumatic injuries **OR** Falls **OR** Traffic collision **OR** multiple trauma **OR** Traumatic injury **OR** Gunshot injury **OR** Stab wound

### 3. Intervention

Psychotherapy **OR** Psychotherapies **OR** Physiotherapy **OR** Physiotherapies **OR** physical therapy **OR** physical therapies **OR** EMDR **OR** eye movement desensitisation **OR** desensitization **OR** prevention **OR** intervention **OR** therapy **OR** therapies **OR** psychoeducation **OR** treatment **OR** cognitive behavioural therapy **OR** CBT **OR** rehabilitation **OR** imagery **OR** exercise **OR** movement therapy **OR** exercise training **OR** physical activity **OR** aerobic exercise **OR** physical exercise **OR** resistance training **OR** strength training **OR** endurance exercise **OR** physical therapy **OR** manual therapy **OR** massage **OR** acupuncture **OR** aerobic
